# Supplementary material for: On the new low-dimensional organic–inorganic hybrid solids Cu4(bipy)4[V4P2O19]·nH2O (n∼ 5) and Cu2(bipy)2[V2P2O12] with linear [V4P2O19]8– and cyclic [V2P2O12]4– oligomers
Source: Royal Society of Chemistry journal article supplement (doi:10.1039/b508928j), 2005-01-01
Supplement: b508928j.pdf [file b508928j.pdf]

**On the new low-dimensional organic–inorganic hybrid solids  
 $\text{Cu}_4(\text{bipy})_4[\text{V}_4\text{P}_2\text{O}_{19}] \cdot n\text{H}_2\text{O}$  ( $n \sim 5$ ) and  $\text{Cu}_2(\text{bipy})_2[\text{V}_2\text{P}_2\text{O}_{12}]$  with linear  $[\text{V}_4\text{P}_2\text{O}_{19}]^{8-}$   
and cyclic  $[\text{V}_2\text{P}_2\text{O}_{12}]^{4-}$  oligomers.**

S. Ushak,<sup>a</sup> E. Spodine,<sup>a\*</sup> D. Venegas-Yazigi,<sup>a</sup> E. Le Fur,<sup>b\*</sup> J. Y. Pivan,<sup>b</sup> O. Peña<sup>b</sup>, R. Cardoso-Gil<sup>c</sup> and R. Kniep<sup>c\*</sup>

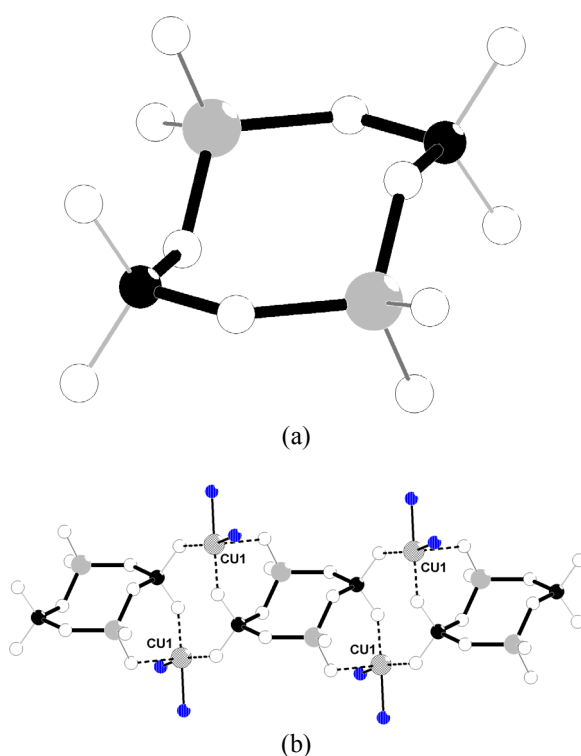

**Fig. 2 : (a)** The 8-membered rings  $\{\text{V}_2\text{P}_2\text{O}_{12}\}$  in **2**. **(b)** Infinite chain of rings linked along the  $a$  direction by  $\text{Cu}(\text{bipy})$  complexes. Atoms labelling: white: oxygen, blue: nitrogen, black: phosphorous, gray: vanadium.

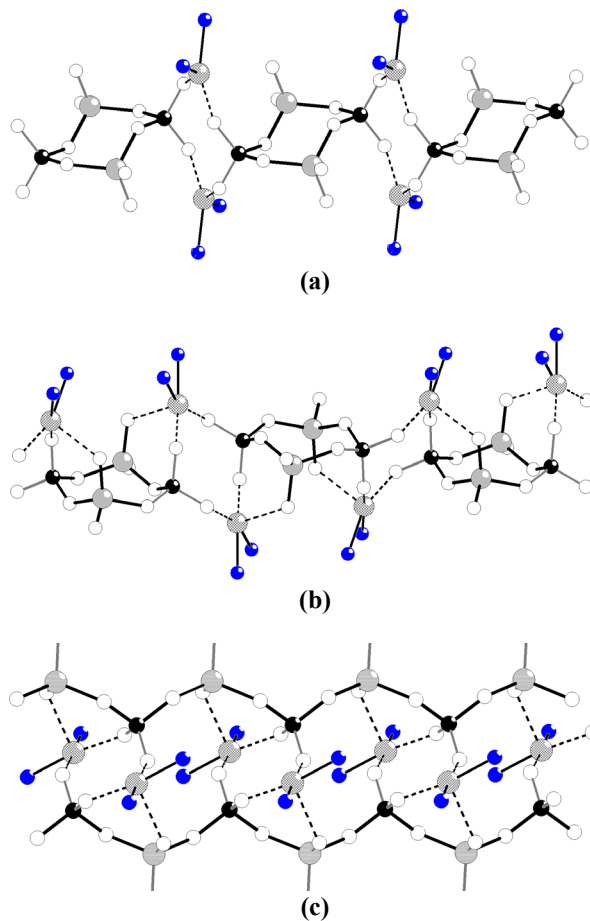

**Fig. 3** : The inorganic Cu/VPO sub-structure for (a)  $\text{Cu}_2(\text{dpa})_2\text{V}_2\text{P}_2\text{O}_{12}$ , (b)  $\text{Cu}_2(\text{phen})_2\text{V}_2\text{P}_2\text{O}_{12}$  and (c)  $\text{Cu}(\text{bipy})\text{VPO}_6$ . Atoms labelling as in Fig. 2.
